# Supplementary material
Source: PubMed Central journal article supplement (PMC5712487)

## Supplementary Figure 1

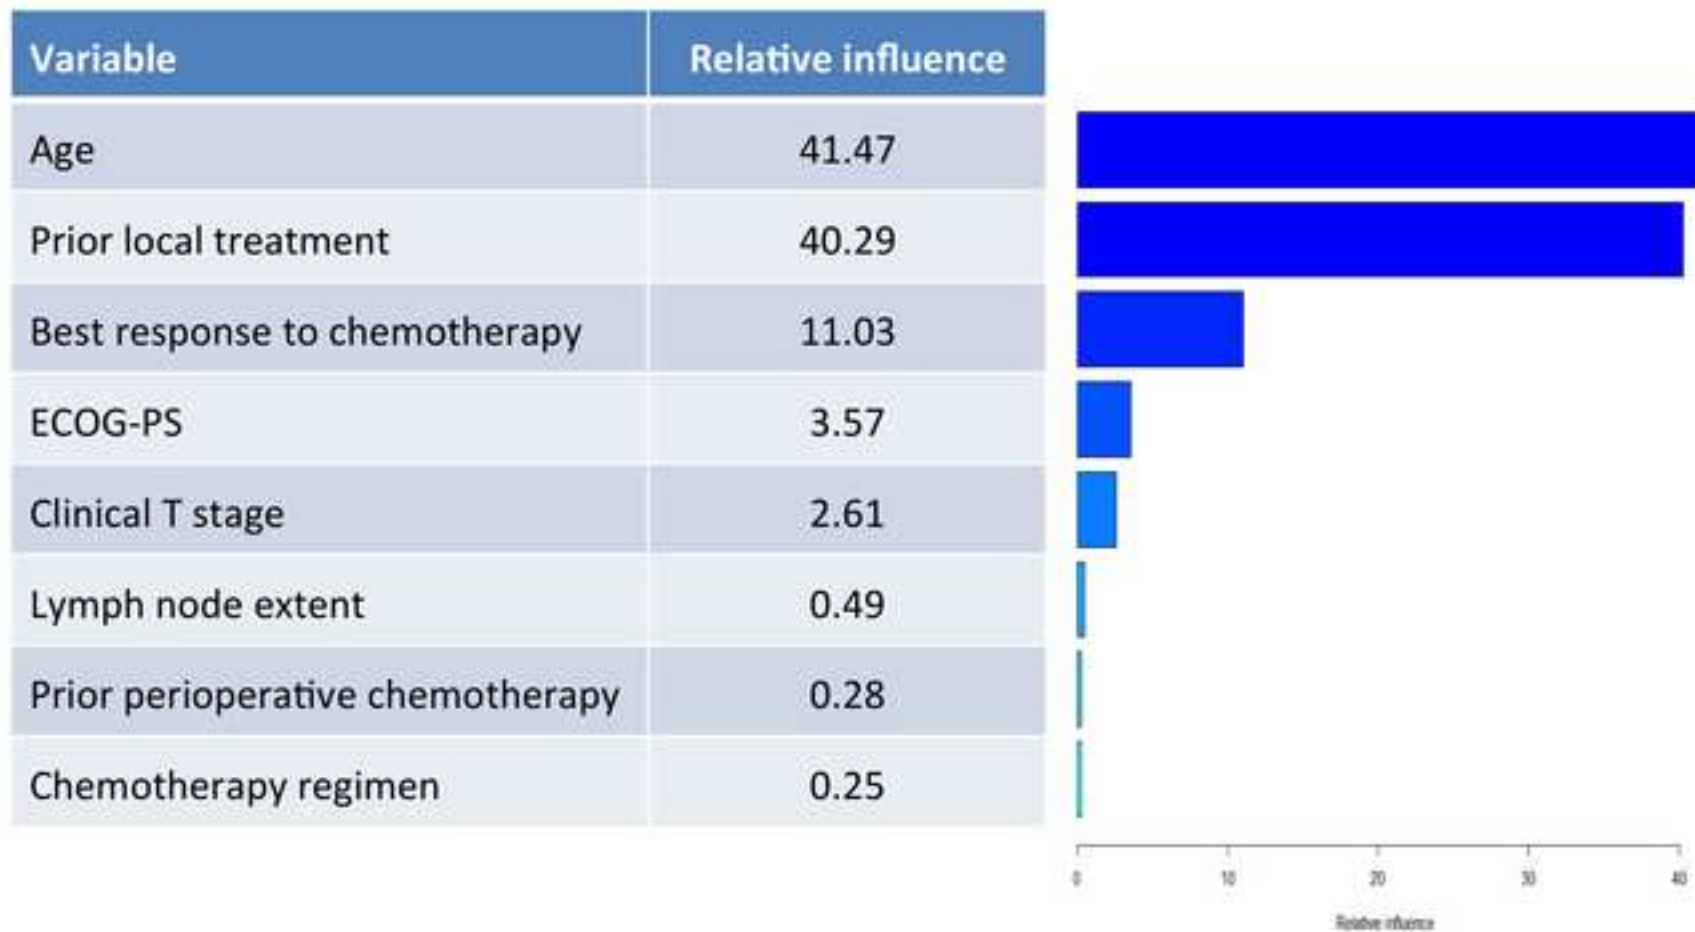

## Supplementary Figure 2

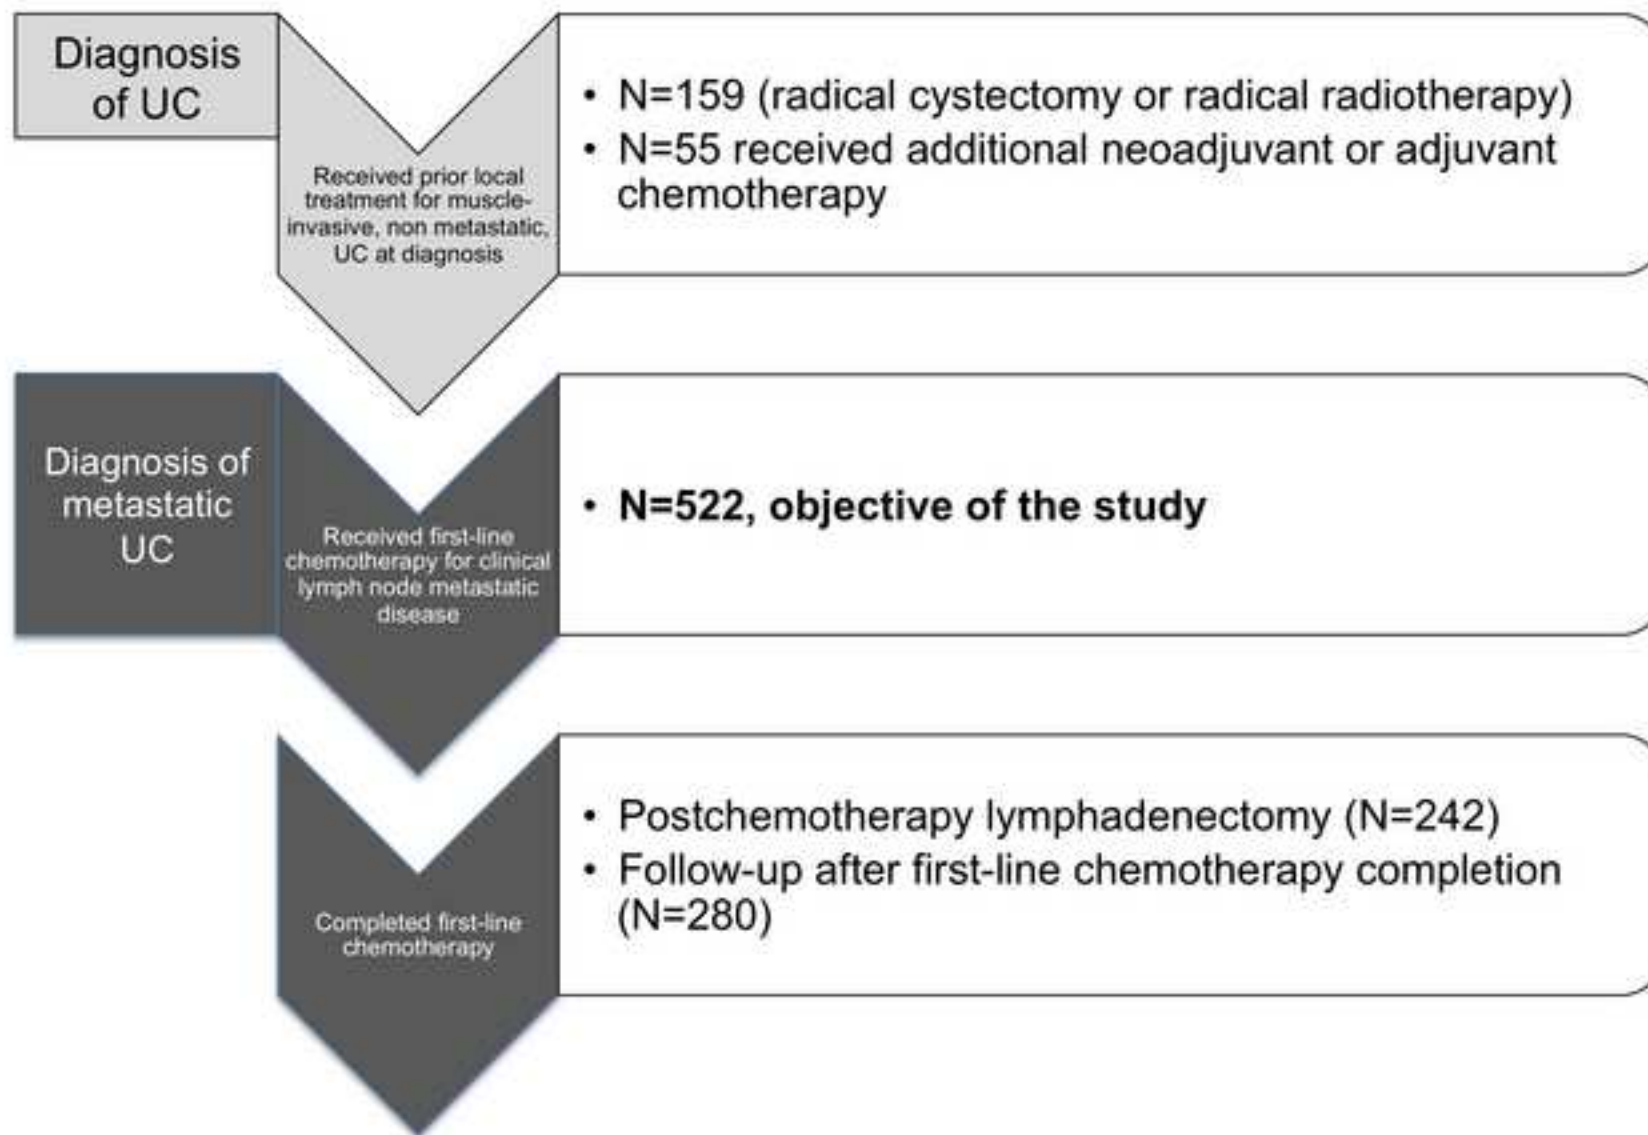

### Supplementary Figure 3

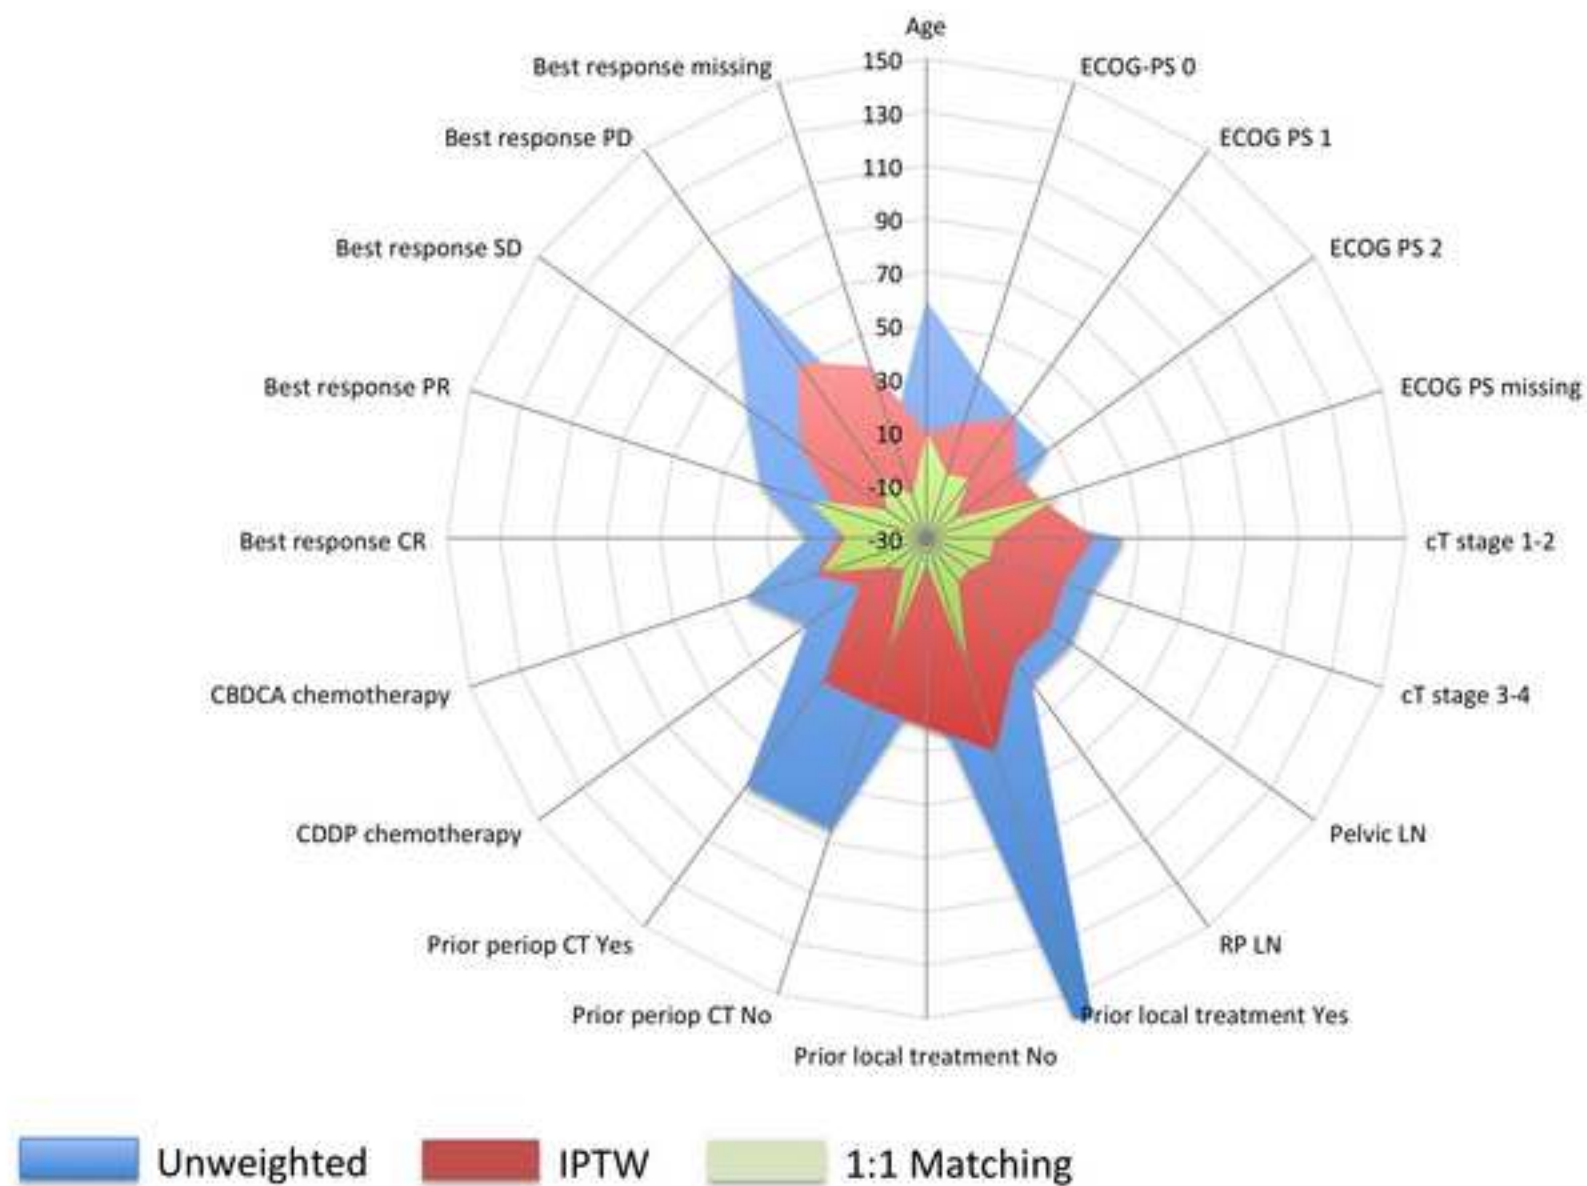

## Supplementary Figure 4

| Prognostic Factors           | HR (95% CI)        | P            |
|------------------------------|--------------------|--------------|
| <b>Age</b>                   |                    | <b>0.937</b> |
| < 64                         | 0.85 (0.56 - 1.28) |              |
| >= 64                        | 0.87 (0.56 - 1.35) |              |
| <b>ECOG-PS</b>               |                    | <b>0.114</b> |
| 0                            | 1.06 (0.70 - 1.65) |              |
| >= 1                         | 0.67 (0.44 - 1.02) |              |
| <b>Nodal extent</b>          |                    | <b>0.182</b> |
| Pelvic                       | 0.75 (0.52 - 1.08) |              |
| RP                           | 1.12 (0.68 - 1.84) |              |
| <b>Prior local treatment</b> |                    | <b>0.070</b> |
| No                           | 0.93 (0.67 - 1.31) |              |
| Yes                          | 0.51 (0.28 - 0.93) |              |
| <b>Prior PO-CT</b>           |                    | <b>0.490</b> |
| No                           | 0.88 (0.64 - 1.22) |              |
| Yes                          | 0.57 (0.17 - 1.89) |              |
| <b>CT regimen</b>            |                    | <b>0.884</b> |
| CDDP                         | 0.85 (0.61 - 1.20) |              |
| CBDCA                        | 0.90 (0.46 - 1.77) |              |
| <b>Best response to CT</b>   |                    | <b>0.275</b> |
| CR                           | 0.88 (0.42 - 1.87) |              |
| PR                           | 1.01 (0.67 - 1.54) |              |
| SD/PD                        | 0.60 (0.36 - 0.99) |              |

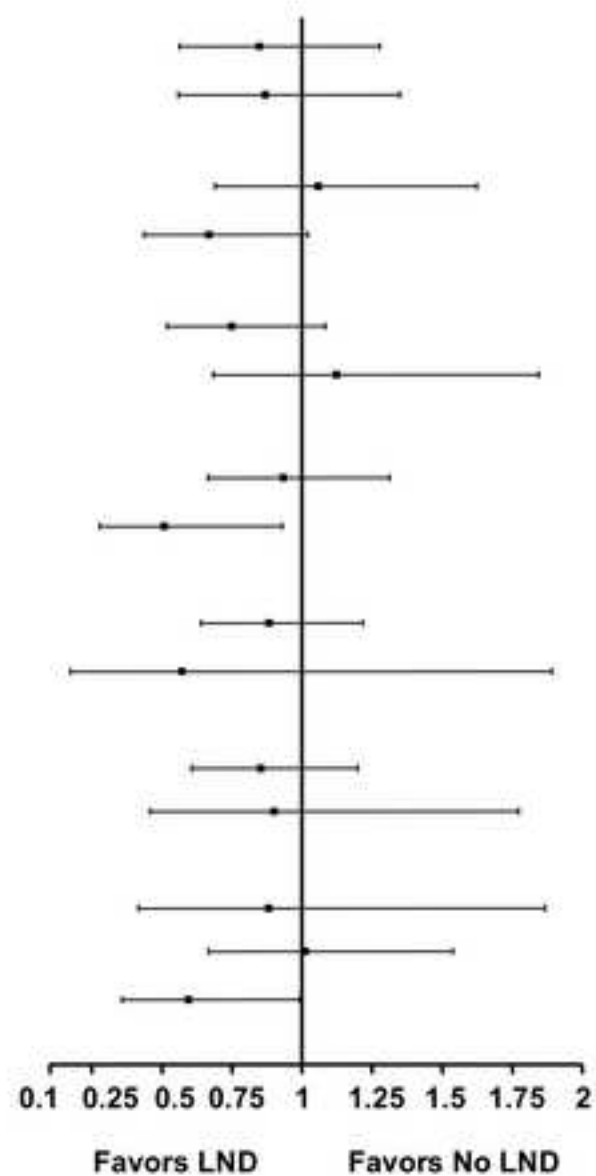

## Supplementary Figure 5

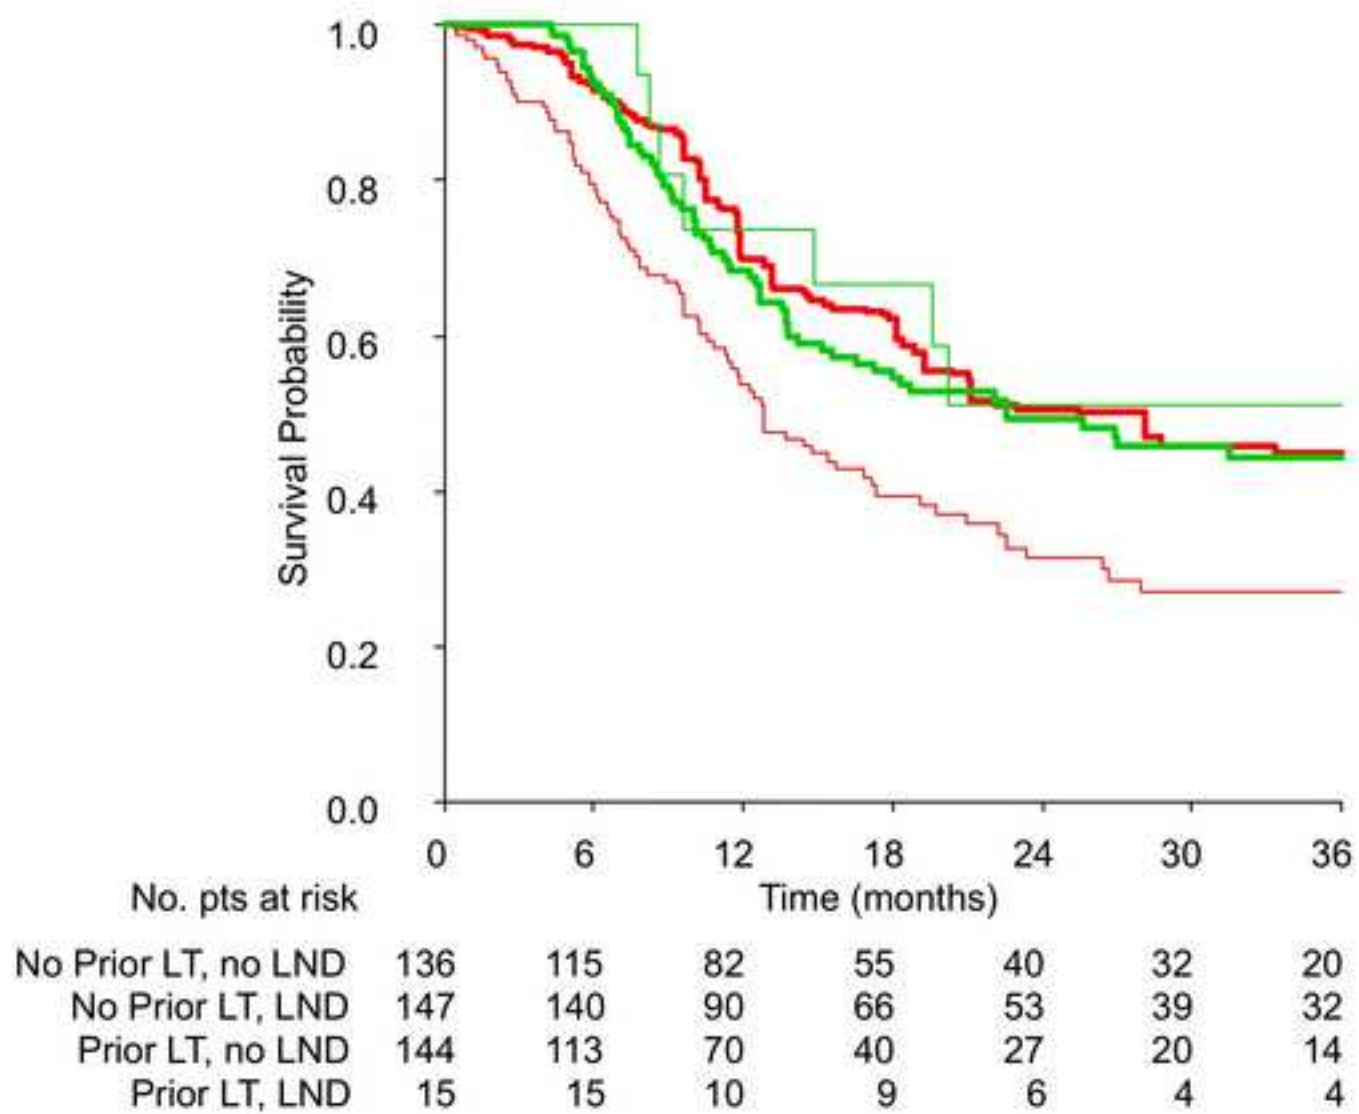

Supplement: NIHMS901371-supplement-Supplemental_figures.pdf [file NIHMS901371-supplement-Supplemental_figures.pdf]
